# Supplementary material for: Tunable electronic structures of Janus In2Ge2X3Y3 (X, Y = S, Se and Te) monolayers under external fields
Source: Royal Society of Chemistry journal article supplement (doi:10.1039/d4tc02618g), 2024-01-01
Supplement: d4tc02618g1.pdf [file d4tc02618g1.pdf]

**Tunable electronic structures upon Janus  $\text{In}_2\text{Ge}_2\text{X}_3\text{Y}_3$  (X, Y =S, Se and Te) monolayers by external fields**

Xuemin Hu<sup>1,2</sup>, Jialin Yang<sup>2</sup>, Wei Wang<sup>1</sup>, Xingjian Zhang<sup>1</sup>, Yufei Meng<sup>1</sup>, Yuanfeng Ye<sup>1,\*</sup>, Kaining Ding<sup>3</sup>, Fengjun Zhang<sup>4\*</sup> and Shengli Zhang<sup>2</sup>

<sup>1</sup> School of Material Engineering, Jinling Institute of Technology, Nanjing 211169, China

<sup>2</sup> MIIT Key Laboratory of Advanced Display Materials and Devices, School of Materials Science and Engineering, Nanjing University of Science and Technology, Nanjing 210094, China

<sup>3</sup> College of Chemistry Research Institute of Photocatalysis, State Key Laboratory of Photocatalysis on Energy and Environment, Fuzhou University, Fujian 350108, China

<sup>4</sup> Anhui Province International Research Center on Advanced Building Materials, Anhui Jianzhu University, Hefei 230601, Anhui China

\*Corresponding author. E-mail: yyf@jit.edu.cn; fjzhang@ahjzu.edu.cn

**Table S1.** The Mulliken charge distributions of monolayer  $\text{In}_2\text{Ge}_2\text{S}_3\text{Se}_3$ 

| Biaxial strain | Mulliken charge distributions  e |      |      |       |       |
|----------------|----------------------------------|------|------|-------|-------|
|                | In                               | Ge1  | Ge2  | S     | Se    |
| -8%            | 0.63                             | 0.43 | 0.24 | -0.39 | -0.25 |
| -6%            | 0.64                             | 0.44 | 0.23 | -0.4  | -0.25 |
| -4%            | 0.64                             | 0.44 | 0.23 | -0.4  | -0.25 |
| -2%            | 0.65                             | 0.46 | 0.28 | -0.42 | -0.27 |
| 0%             | 0.66                             | 0.47 | 0.32 | -0.42 | -0.28 |
| 2%             | 0.65                             | 0.48 | 0.31 | -0.42 | -0.27 |
| 4%             | 0.65                             | 0.49 | 0.32 | -0.43 | -0.27 |
| 6%             | 0.63                             | 0.49 | 0.37 | -0.43 | -0.28 |
| 8%             | 0.56                             | 0.62 | 0.22 | -0.44 | -0.21 |

**Table S2.** The Mulliken charge distributions of monolayer  $\text{In}_2\text{Ge}_2\text{S}_3\text{Te}_3$ 

| Biaxial strain | Mulliken charge distributions  e |      |      |       |       |
|----------------|----------------------------------|------|------|-------|-------|
|                | In                               | Ge1  | Ge2  | S     | Te    |
| -8%            | 0.50                             | 0.47 | 0.24 | -0.43 | -0.14 |
| -6%            | 0.48                             | 0.46 | 0.15 | -0.4  | -0.12 |
| -4%            | 0.49                             | 0.47 | 0.16 | -0.41 | -0.13 |
| -2%            | 0.51                             | 0.48 | 0.18 | -0.42 | -0.14 |
| 0%             | 0.50                             | 0.49 | 0.23 | -0.42 | -0.15 |
| 2%             | 0.51                             | 0.48 | 0.21 | -0.43 | -0.14 |
| 4%             | 0.51                             | 0.48 | 0.22 | -0.43 | -0.14 |
| 6%             | 0.50                             | 0.47 | 0.23 | -0.43 | -0.14 |
| 8%             | 0.56                             | 0.62 | 0.22 | -0.44 | -0.21 |

**Table S3.** The Mulliken charge distributions of monolayer  $\text{In}_2\text{Ge}_2\text{Se}_3\text{Te}_3$ 

| Biaxial strain | Mulliken charge distributions  e |      |      |       |       |
|----------------|----------------------------------|------|------|-------|-------|
|                | In                               | Ge1  | Ge2  | Se    | Te    |
| -8%            | 0.33                             | 0.40 | 0.12 | -0.28 | -0.11 |
| -6%            | 0.34                             | 0.42 | 0.13 | -0.29 | -0.12 |
| -4%            | 0.35                             | 0.43 | 0.14 | -0.30 | -0.13 |
| -2%            | 0.35                             | 0.44 | 0.14 | -0.30 | -0.13 |
| 0%             | 0.33                             | 0.44 | 0.13 | -0.30 | -0.12 |
| 2%             | 0.35                             | 0.44 | 0.15 | -0.30 | -0.12 |
| 4%             | 0.35                             | 0.40 | 0.17 | -0.30 | -0.12 |
| 6%             | 0.36                             | 0.40 | 0.16 | -0.30 | -0.12 |
| 8%             | 0.36                             | 0.39 | 0.17 | -0.30 | -0.12 |

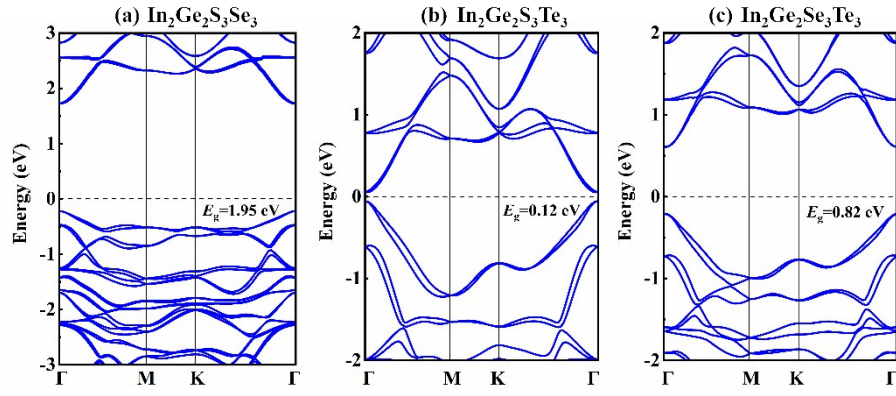

**Fig. S1** Electronic band structures of monolayer  $\text{In}_2\text{Ge}_2\text{X}_3\text{Y}_3$  using the HSE06 hybrid functional with SOC. The Fermi level is set to zero presented by the black dash line.

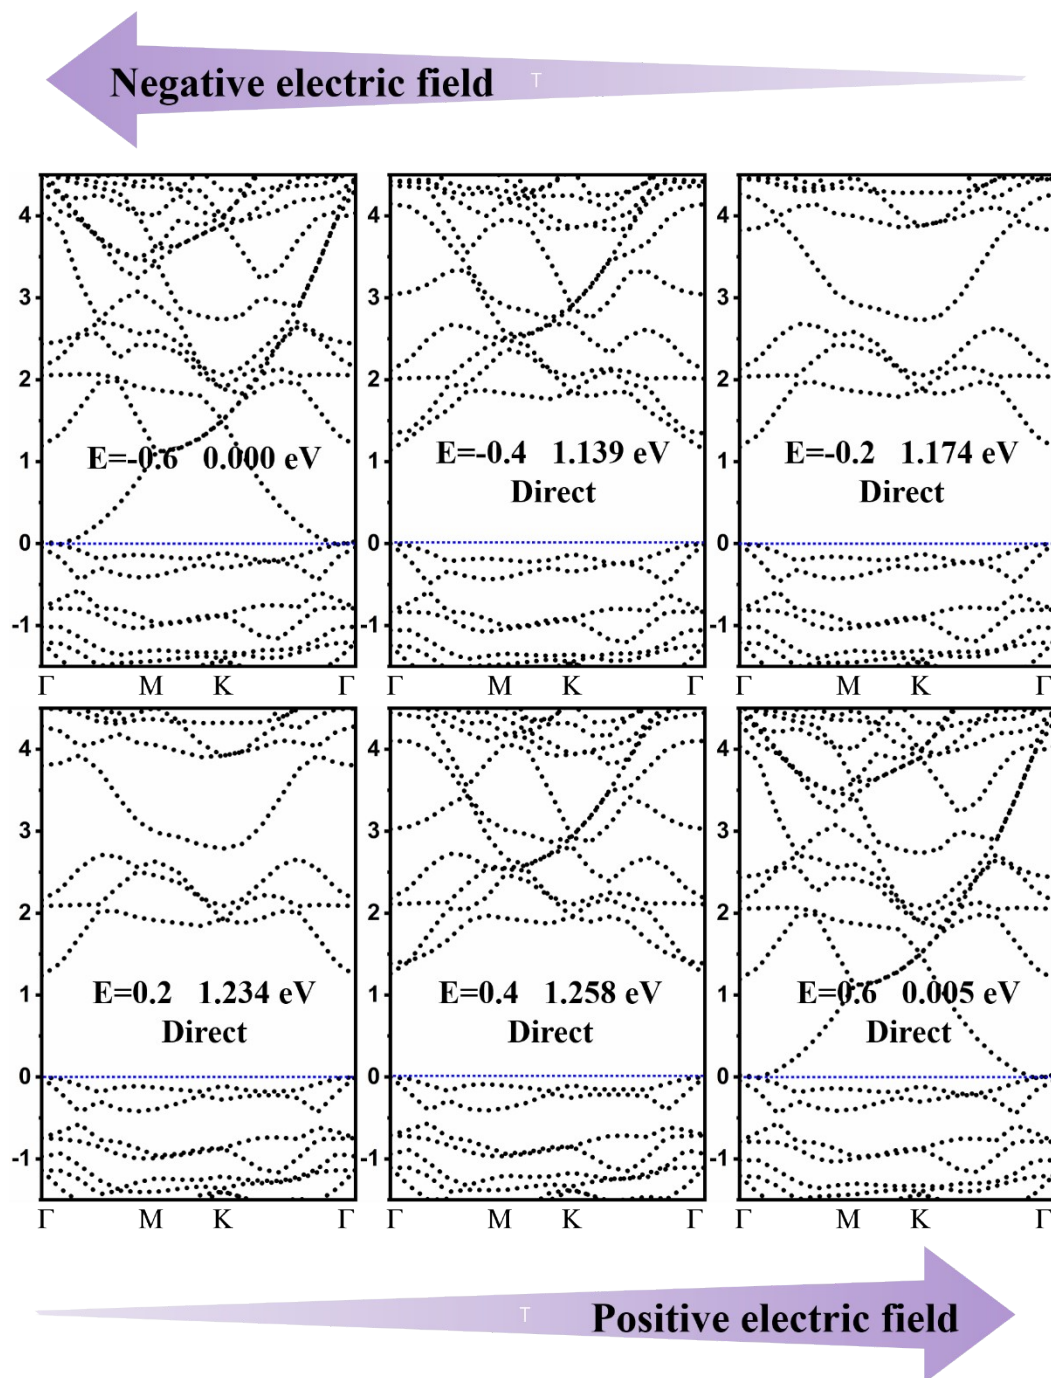

**Fig. S2** Electronic band structures of monolayer  $\text{In}_2\text{Ge}_2\text{S}_3\text{Se}_3$  with various electric fields using the PBE functional. The Fermi level is set to zero presented by the blue dash line.

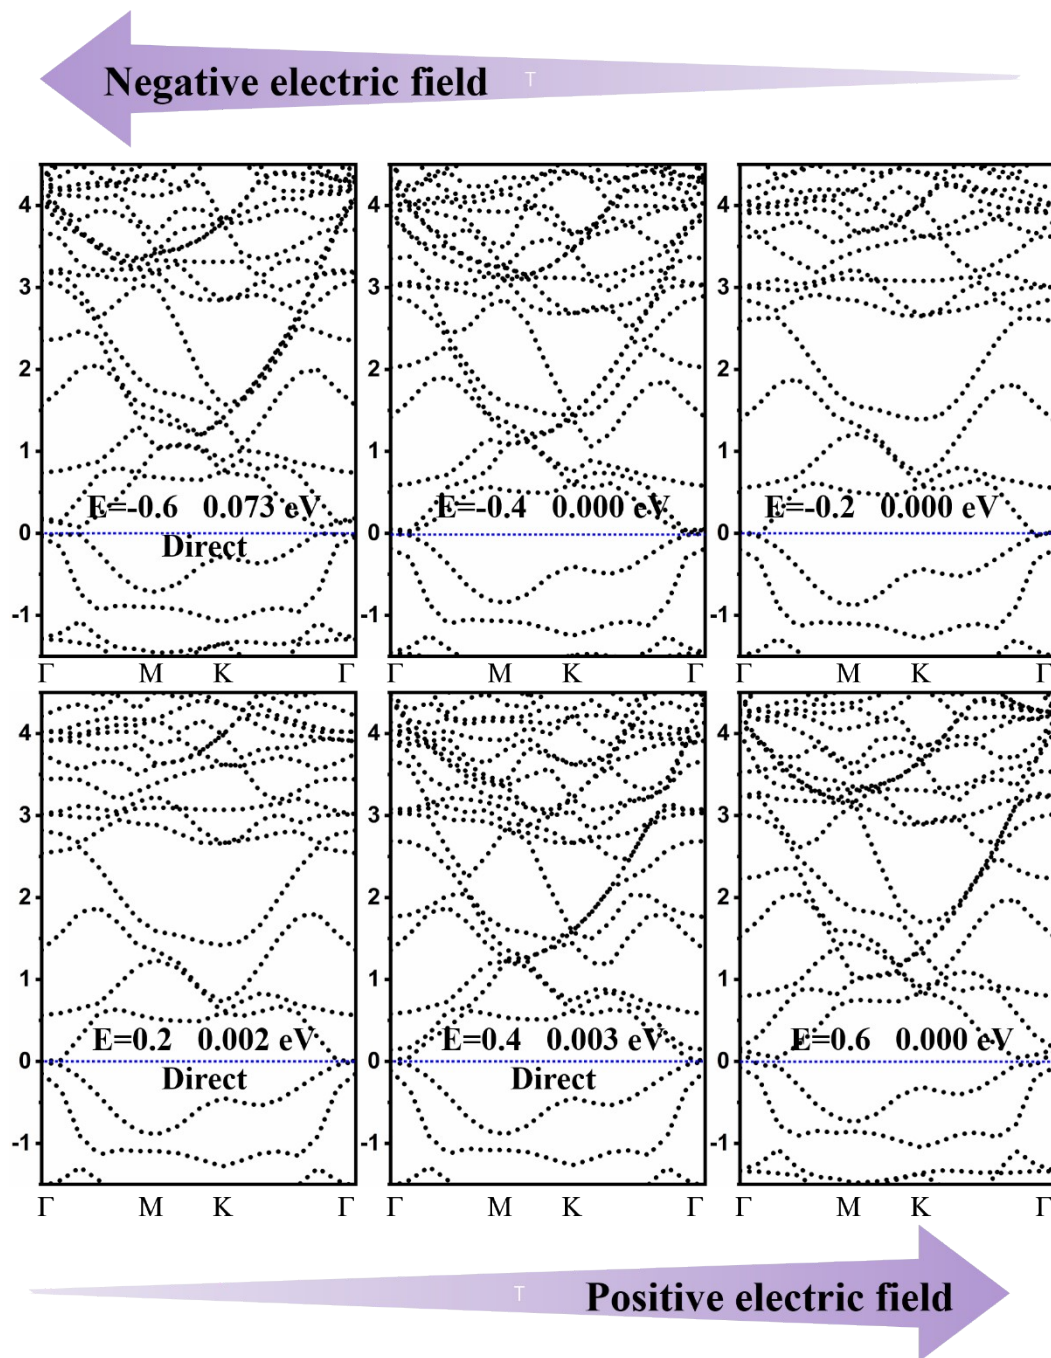

**Fig. S3** Electronic band structures of monolayer  $\text{In}_2\text{Ge}_2\text{S}_3\text{Te}_3$  with various electric fields using the PBE functional. The Fermi level is set to zero presented by the blue dash line.

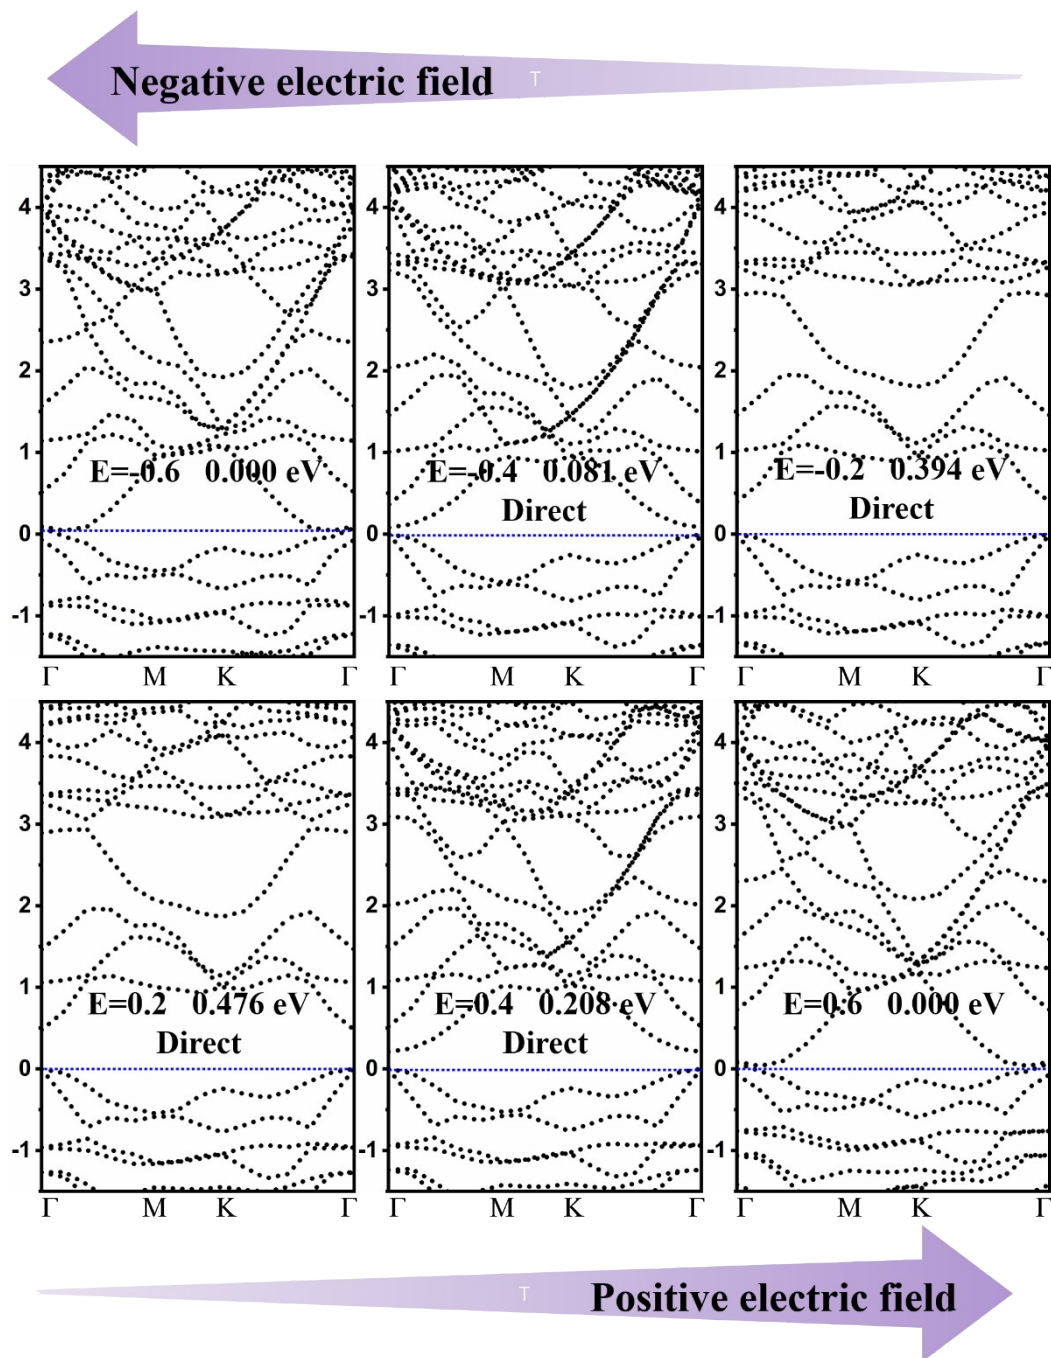

**Fig. S4** Electronic band structures of monolayer  $\text{In}_2\text{Ge}_2\text{Se}_3\text{Te}_3$  with various electric fields using the PBE functional. The Fermi level is set to zero presented by the blue dash line.

**Table S4.** The Mulliken charge distributions of monolayer  $\text{In}_2\text{Ge}_2\text{S}_3\text{Se}_3$ 

| Electric field<br>(eV/Å/e) | Mulliken charge distributions  e |      |      |       |       |
|----------------------------|----------------------------------|------|------|-------|-------|
|                            | In                               | Ge1  | Ge2  | S     | Se    |
| -0.6                       | 0.69                             | 0.26 | 0.30 | -0.44 | -0.21 |
| -0.4                       | 0.64                             | 0.46 | 0.30 | -0.44 | -0.24 |
| -0.2                       | 0.64                             | 0.46 | 0.30 | -0.43 | -0.25 |
| 0                          | 0.65                             | 0.46 | 0.28 | -0.42 | -0.27 |
| 0.2                        | 0.65                             | 0.47 | 0.31 | -0.41 | -0.29 |
| 0.4                        | 0.65                             | 0.48 | 0.31 | -0.40 | -0.30 |
| 0.6                        | 0.66                             | 0.48 | 0.50 | -0.37 | -0.39 |

**Table S5.** The Mulliken charge distributions of monolayer  $\text{In}_2\text{Ge}_2\text{S}_3\text{Te}_3$ 

| Electric field<br>(eV/Å/e) | Mulliken charge distributions  e |      |      |       |       |
|----------------------------|----------------------------------|------|------|-------|-------|
|                            | In                               | Ge1  | Ge2  | S     | Te    |
| -0.6                       | 0.66                             | 0.03 | 0.21 | -0.44 | -0.07 |
| -0.4                       | 0.54                             | 0.36 | 0.21 | -0.45 | -0.11 |
| -0.2                       | 0.51                             | 0.47 | 0.21 | -0.44 | -0.13 |
| 0                          | 0.50                             | 0.49 | 0.23 | -0.42 | -0.15 |
| 0.2                        | 0.52                             | 0.48 | 0.21 | -0.42 | -0.17 |
| 0.4                        | 0.53                             | 0.49 | 0.22 | -0.40 | -0.19 |
| 0.6                        | 0.55                             | 0.47 | 0.58 | -0.38 | -0.32 |

**Table S6.** The Mulliken charge distributions of monolayer  $\text{In}_2\text{Ge}_2\text{Se}_3\text{Te}_3$ 

| Electric field<br>(eV/Å/e) | Mulliken charge distributions  e |      |      |       |       |
|----------------------------|----------------------------------|------|------|-------|-------|
|                            | In                               | Ge1  | Ge2  | Se    | Te    |
| -0.6                       | 0.36                             | 0.68 | 0.14 | -0.46 | -0.03 |
| -0.4                       | 0.34                             | 0.48 | 0.15 | -0.35 | -0.09 |
| -0.2                       | 0.34                             | 0.45 | 0.15 | -0.32 | -0.11 |
| 0                          | 0.33                             | 0.44 | 0.13 | -0.30 | -0.12 |
| 0.2                        | 0.34                             | 0.44 | 0.15 | -0.28 | -0.15 |
| 0.4                        | 0.34                             | 0.44 | 0.16 | -0.26 | -0.17 |
| 0.6                        | 0.35                             | 0.43 | 0.45 | -0.23 | -0.29 |
